# Supplementary material
Source: PubMed Central journal article supplement (PMC6433162)
Supplement: ap8b00117_si_001.pdf [file ap8b00117_si_001.pdf]

## Supporting information (SI) for

# Rewritable Optical Patterns in Light Responsive Ultra High Molecular Weight Polyethylene

Sarah S.D. Lafleur<sup>a</sup>, John R. Severn<sup>b</sup>, Rob C.P. Verpaalen<sup>a</sup>, Albert P.H.J. Schenning<sup>a</sup> and Cees W.M. Bastiaansen<sup>a,c\*</sup>

<sup>a</sup> Laboratory of Stimuli-responsive Functional Materials and Devices, Eindhoven University of Technology, P.O. Box 513, 5600 MB, The Netherlands

<sup>b</sup> DSM Material Science Center, Urmonderbaan 22, 6167RD Geleen, The Netherlands

<sup>c</sup> School of Engineering and Materials Science, Queen Mary, University of London, London E1 4NS, UK.

\*To whom correspondence should be addressed. E-mail: [c.w.m.bastiaansen@tue.nl](mailto:c.w.m.bastiaansen@tue.nl)

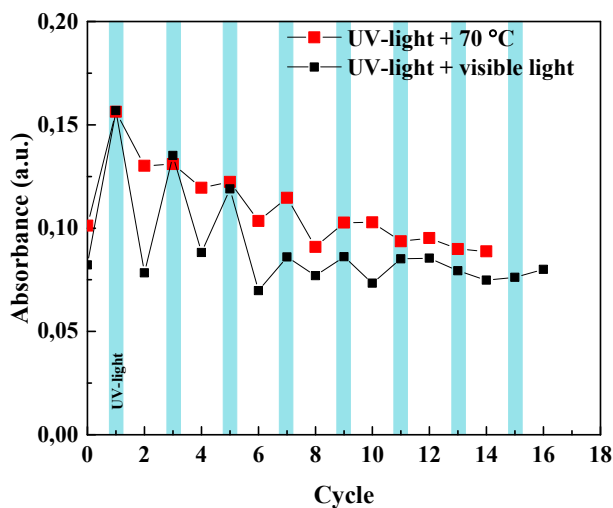

**Figure S1.** Cyclic photo-isomerization of the UH\_DR60 tapes is investigated at  $\lambda_{\max} \sim 550$  nm. The blue boxes indicate exposure to UV-light for 5 minutes. Data points in red correspond to the absorbance after cyclic exposure to UV-light and heat (3 min.). The data set in black corresponds to UV-light and green light cyclic exposure (5 min.).

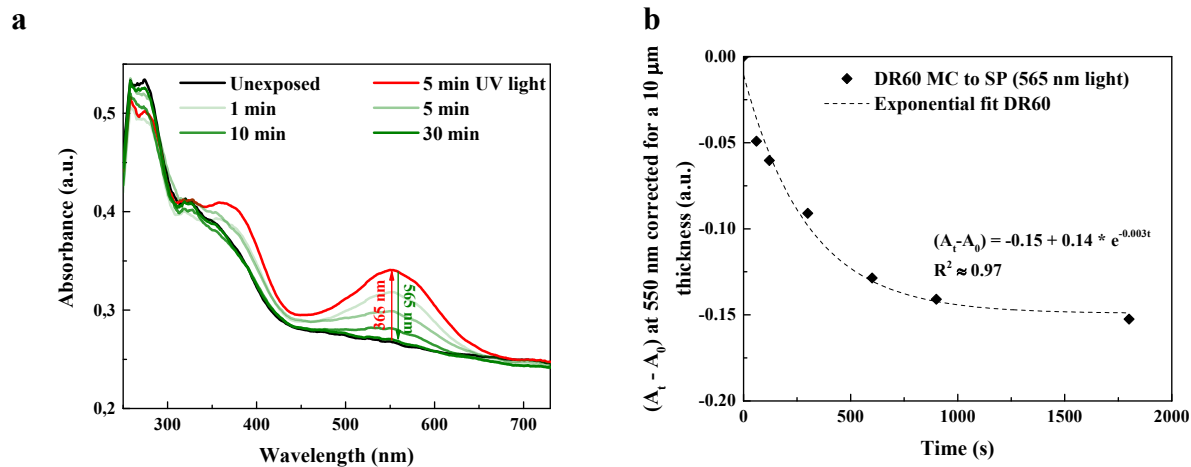

**Figure S2.** (a) UV-vis spectra of the films showing the isomerization from MC to SP upon exposure to green (565 nm) light for UH\_DR60. (b) The photochromic decoloration process was fitted with a first order exponential function in a  $(A_t - A_0)$  versus time plot at  $\lambda_{\text{max}} = 550$  nm.

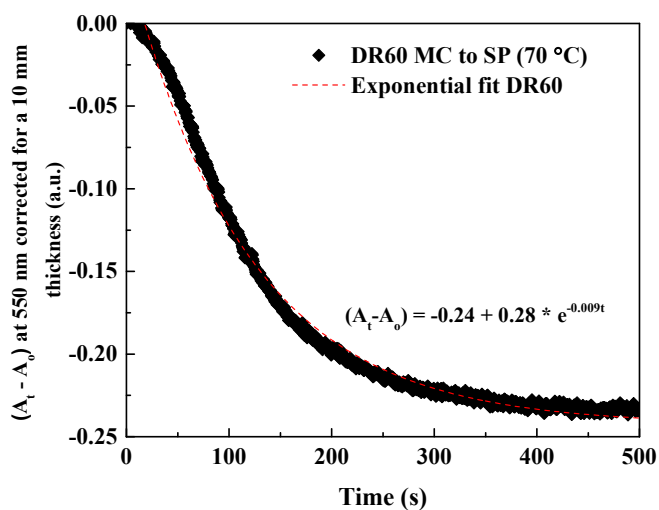

**Figure S3.** The thermal decoloration process (at 70 °C) was fitted with a first order exponential function in a  $(A_t - A_0)$  versus time plot at  $\lambda_{\text{max}} = 550$  nm.

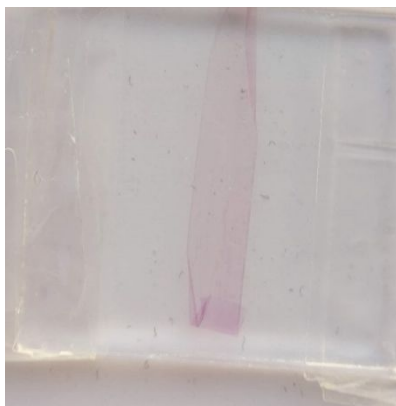

**Figure S4.** The UH\_DR60 tape after UV exposure and soaking in xylene for 2 days, reveals that the photochromic response can still be observed.
